# Supplementary material for: Safety and Tolerability of Plasma Exchange and Immunoadsorption in Neuroinflammatory Diseases
Source: MDPI journal article supplement (doi:10.3390/jcm9092874), 2020-09-05
Supplement: s1 [file s1]

**Supplementary Table 1.** Baseline Characteristics of patients with MS/CIS

|                                              | IA               | PE               | Total            | p    |
|----------------------------------------------|------------------|------------------|------------------|------|
| <b>Patients (cycles)</b>                     | 72 (100)         | 21 (27)          | 93 (127)         |      |
| <b>Age (years)</b>                           | 41.5 (29.0–49.0) | 38.0 (29.0–40.5) | 40.0 (29.0–49.0) | 0.23 |
| <b>Sex</b>                                   |                  |                  |                  | 1.00 |
| male                                         | 19 (26.4 %)      | 5 (23.8 %)       | 24 (25.8 %)      |      |
| female                                       | 53 (73.6 %)      | 16 (76.2 %)      | 69 (74.2 %)      |      |
| <b>BMI (kg/m<sup>2</sup>)</b>                | 24.0 (21.2–27.9) | 23.9 (21.0–26.4) | 23.9 (21.3–27.6) | 0.74 |
| <b>Age at Onset (years)</b>                  | 28.5 (23.8–39.0) | 29.0 (17.0–37.0) | 29.0 (22.5–38.0) | 0.71 |
| <b>Age at Diagnosis (years)</b>              | 30.5 (25.0–39.3) | 29.5 (22.0–39.0) | 30.0 (25.0–39.0) | 0.70 |
| <b>Time between Relapse and IA/PE (days)</b> | 70 (36–136)      | 46 (11–375)      |                  | 0.88 |
| <b>Disease-modifying Therapies</b>           |                  |                  |                  |      |
| Interferon                                   | 16 (22.2%)       | 2 (9.5%)         | 18 (19.4%)       |      |
| Glatiramer acetate                           | 12 (16.7%)       | 2 (9.5%)         | 14 (15.1%)       |      |
| Fingolimod                                   | 16 (22.2%)       | 2 (9.5%)         | 18 (19.4%)       |      |
| Natalizumab                                  | 8 (11.1%)        | 2 (9.5%)         | 10 (10.8%)       |      |
| Teriflunomid                                 | 5 (6.9%)         | 1 (4.8%)         | 6 (6.5%)         |      |
| Dimethyl fumarate                            | 5 (6.9%)         | 3 (14.3%)        | 8 (8.6%)         |      |

IA – immunoadsorption; PE – plasma exchange; BMI – body mass index

**Supplementary Table 2.** Baseline Characteristics of patients with CIDP

|                                 | IA               | PE               | Total            | p    |
|---------------------------------|------------------|------------------|------------------|------|
| <b>Patients (cycles)</b>        | 30 (80)          | 4 (18)           | 34               |      |
| <b>Age (years)</b>              | 61.5 (54.8–71.5) | 78.0 (61.0–79.0) | 62.0 (55.0–74.0) | 0.15 |
| <b>Sex</b>                      |                  |                  |                  | 0.55 |
| male                            | 21 (70.0%)       | 4 (100.0%)       | 25 (73.5 %)      |      |
| female                          | 9 (30.0%)        | 0 (0.0%)         | 9 (26.5 %)       |      |
| <b>BMI (kg/m<sup>2</sup>)</b>   | 26.2 (24.1–30.9) | 24.8(22.6–43.1)  | 26.1 (23.8–30.9) | 0.69 |
| <b>Age at Onset (years)</b>     | 53.0 (46.3–64.8) | 61.5 (60.0–63.0) | 54.5 (48.8–64.0) | 0.33 |
| <b>Age at Diagnosis (years)</b> | 54.0 (48.0–67.0) | 70.0 (70.0–79.0) | 60.0 (50.8–70.8) | 0.08 |
| <b>Previous Therapies</b>       |                  |                  |                  |      |
| Prednisolone                    | 20 (66.7%)       | 3 (75.0%)        | 23 (67.6%)       |      |
| IVIg                            | 24 (80.0%)       | 3 (75.0%)        | 27 (90.0%)       |      |
| Azathioprine                    | 3 (10.0%)        | 0 (0.0%)         | 3 (8.8%)         |      |
| Methotrexate                    | 1 (3.3%)         | 0 (0.0%)         | 1 (2.9%)         |      |

IA – immunoadsorption; PE – plasma exchange; BMI – body mass index; IVIg – intravenous immunoglobulines

**Supplementary Table 3.** Baseline Characteristics of patients with GBS

|                               | IA               | PE               | Total            | p    |
|-------------------------------|------------------|------------------|------------------|------|
| <b>Patients (cycles)</b>      | 17 (22)          | 10 (15)          | 27               |      |
| <b>Age (years)</b>            | 52.0 (36.0–63.0) | 66.0 (60.5–73.0) | 61.0 (39.0–70.5) | 0.07 |
| <b>Sex</b>                    |                  |                  |                  | 1.00 |
| male                          | 7 (41.2%)        | 4 (40.0%)        | 11 (40.7 %)      |      |
| female                        | 10 (58.8%)       | 6 (60.0%)        | 16 (59.3 %)      |      |
| <b>BMI (kg/m<sup>2</sup>)</b> | 22.3 (21.3–25.2) | 27.0 (19.5–29.2) | 23.5 (21.2–26.6) | 0.12 |

IA – immunoadsorption; PE – plasma exchange; BMI – body mass index; IVIg – intravenous immunoglobulines
